# Supplementary material for: Distribution of planktonic biogenic carbonate organisms in the Southern Ocean south of Australia: a baseline for ocean acidification impact assessment
Source: Copernicus journal article supplement (doi:10.5194/bg-15-31-2018), 2018-01-03
Supplement: Supplementary file 2 [file bg-15-31-2018-supplement.zip]

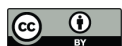

## *Supplement of*

# **Distribution of planktonic biogenic carbonate organisms in the Southern Ocean south of Australia: a baseline for ocean acidification impact assessment**

**Thomas W. Trull et al.**

*Correspondence to:* Thomas W. Trull ([tom.trull@csiro.au](mailto:tom.trull@csiro.au))

- [bg-15-31-2018-supplement-title-page.pdf](#)
- [Supplement\\_bg\\_2017\\_219.pdf](#)
- [Table S1 Particle Compositions.txt](#)
- [Table S2 Seawater properties.txt](#)

The copyright of individual parts of the supplement might differ from the CC BY 3.0 License.
